# Supplementary figures and images for: Aurora A and cortical flows promote polarization and cytokinesis by inducing asymmetric ECT-2 accumulation
Source: eLife journal article supplement (doi:10.7554/elife.83992), 2022-12-19

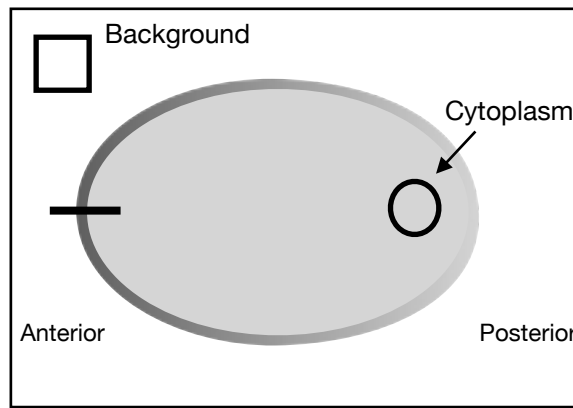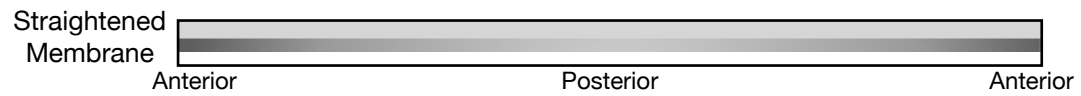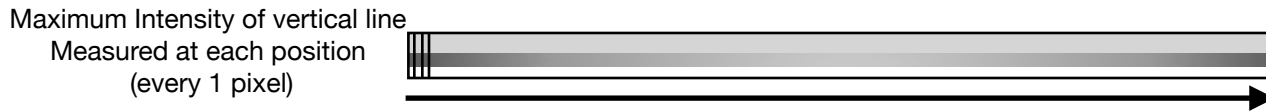

$$\text{Accumulation} = (\text{Maximum Intensity} - \text{Background}) / (\text{Cytoplasm} - \text{Background})$$

Supplement: supp [file elife_poa_e83992_Figure_1_figure_supplement_1.pdf › elife_poa_e83992_Figure_1_figure_supplement_1.pdf]

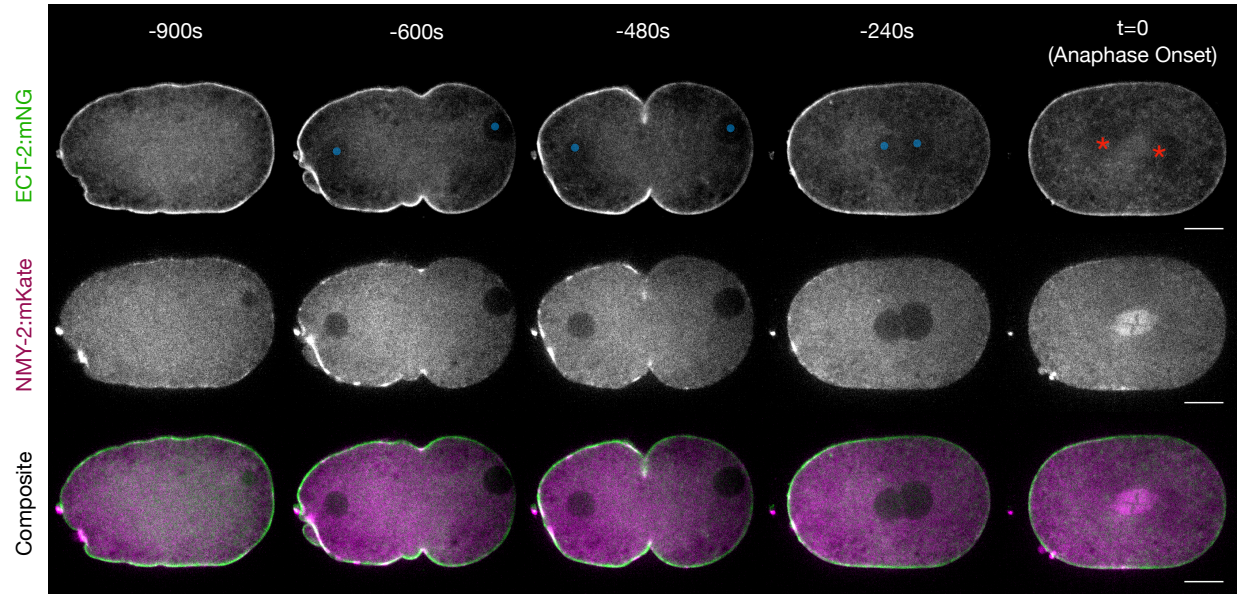

Supplement: supp [file elife_poa_e83992_Figure_1_figure_supplement_2.pdf › elife_poa_e83992_Figure_1_figure_supplement_2.pdf]

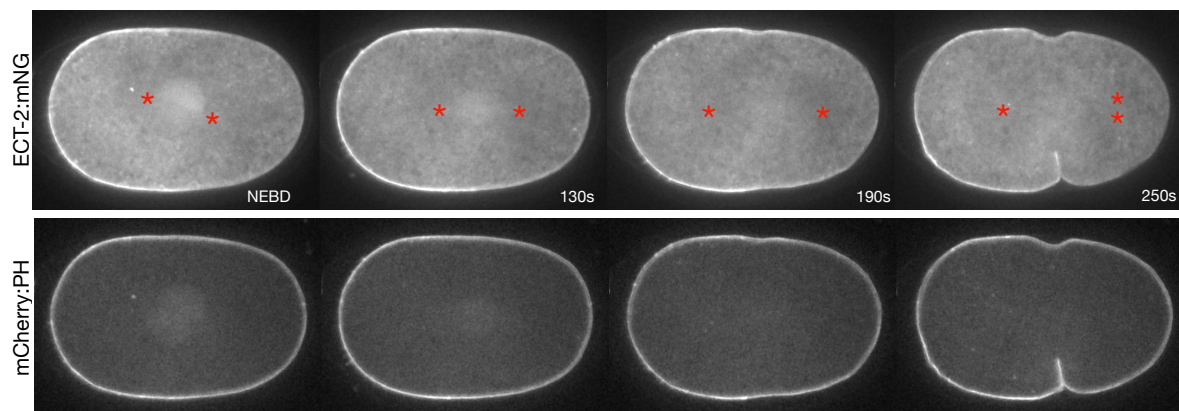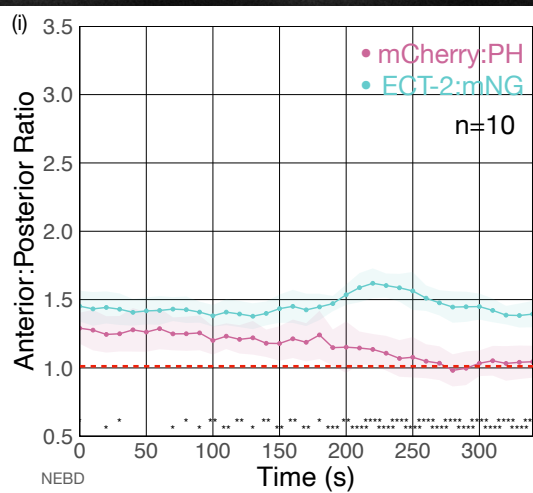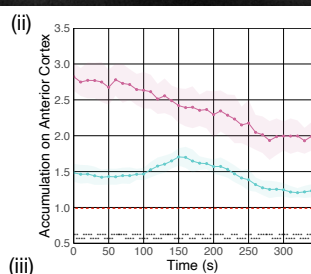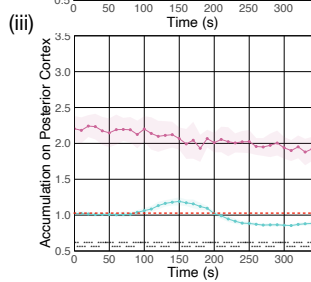

Supplement: supp [file elife_poa_e83992_Figure_1_figure_supplement_3.pdf › elife_poa_e83992_Figure_1_figure_supplement_3.pdf]

ECT-2:mNG

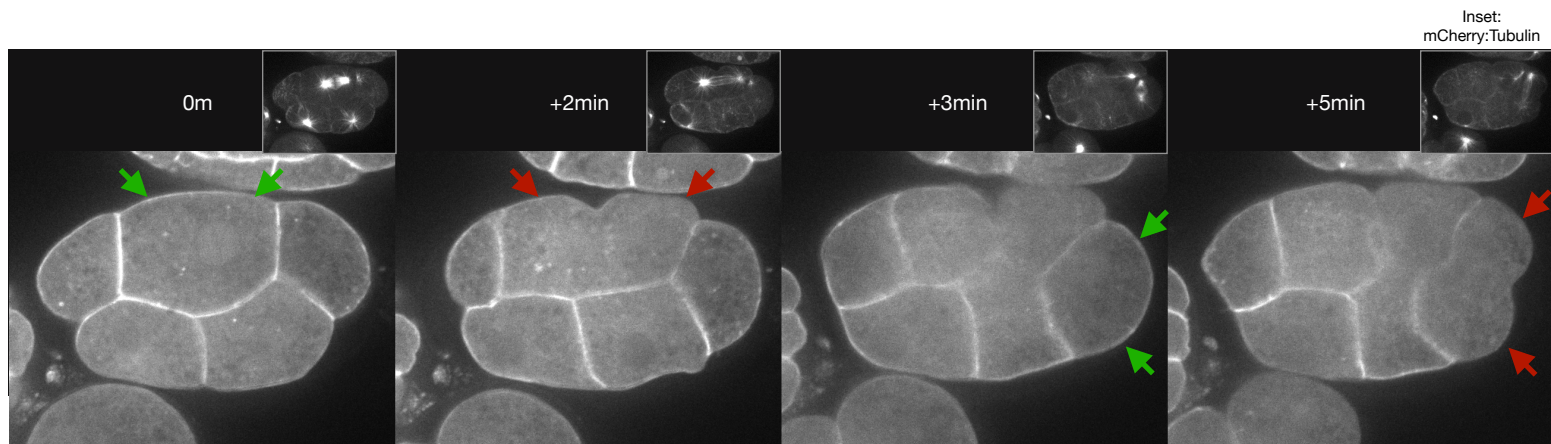

Supplement: supp [file elife_poa_e83992_Figure_1_figure_supplement_4.pdf › elife_poa_e83992_Figure_1_figure_supplement_4.pdf]

## Cytokinesis

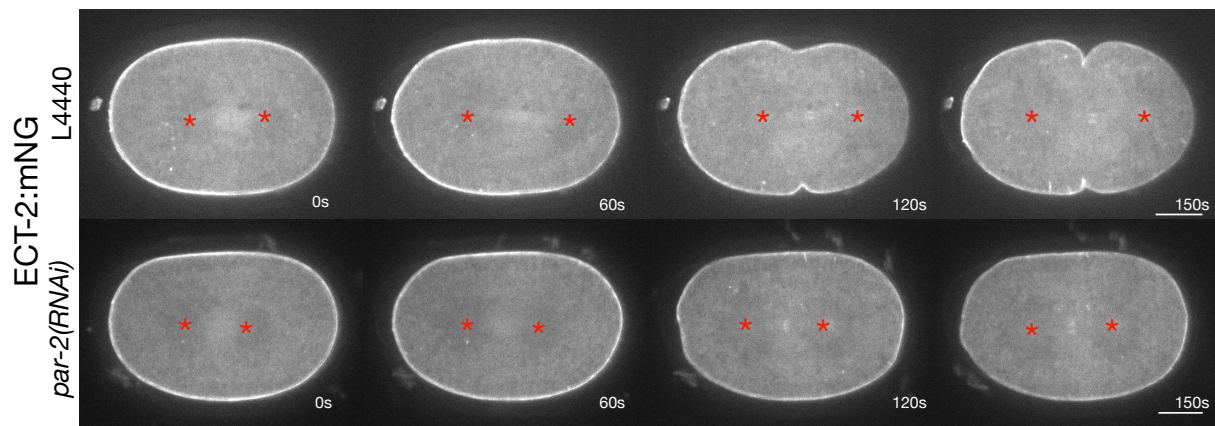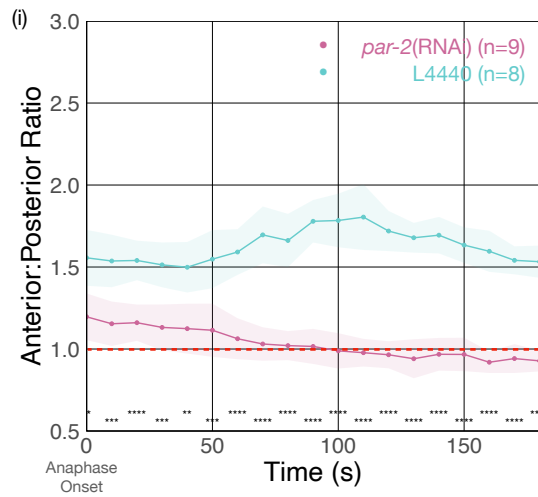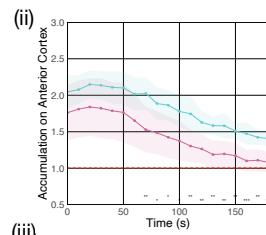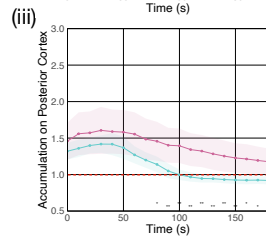

Supplement: supp [file elife_poa_e83992_Figure_2_figure_supplement_1.pdf › elife_poa_e83992_Figure_2_figure_supplement_1.pdf]

Cytokinesis

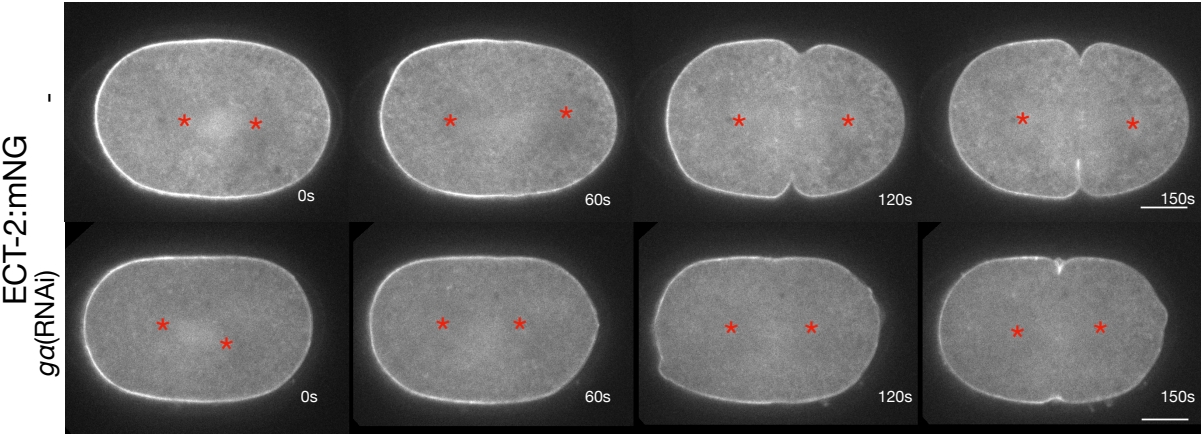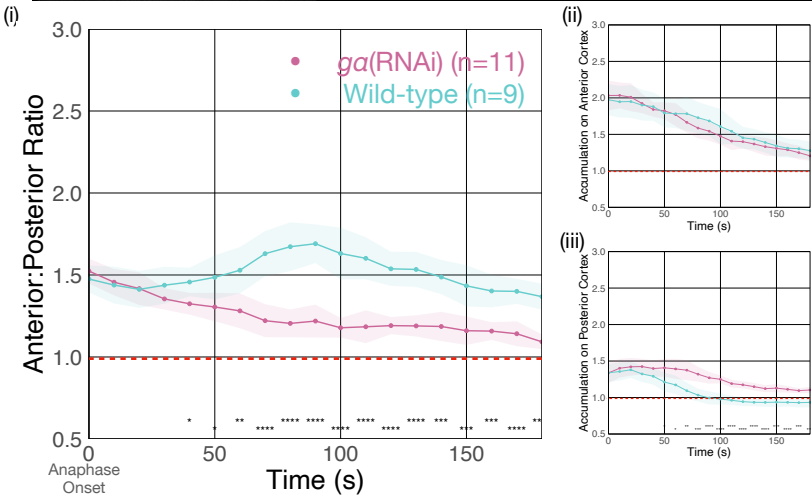

Supplement: supp [file elife_poa_e83992_Figure_2_figure_supplement_2.pdf › elife_poa_e83992_Figure_2_figure_supplement_2.pdf]

Cytokinesis

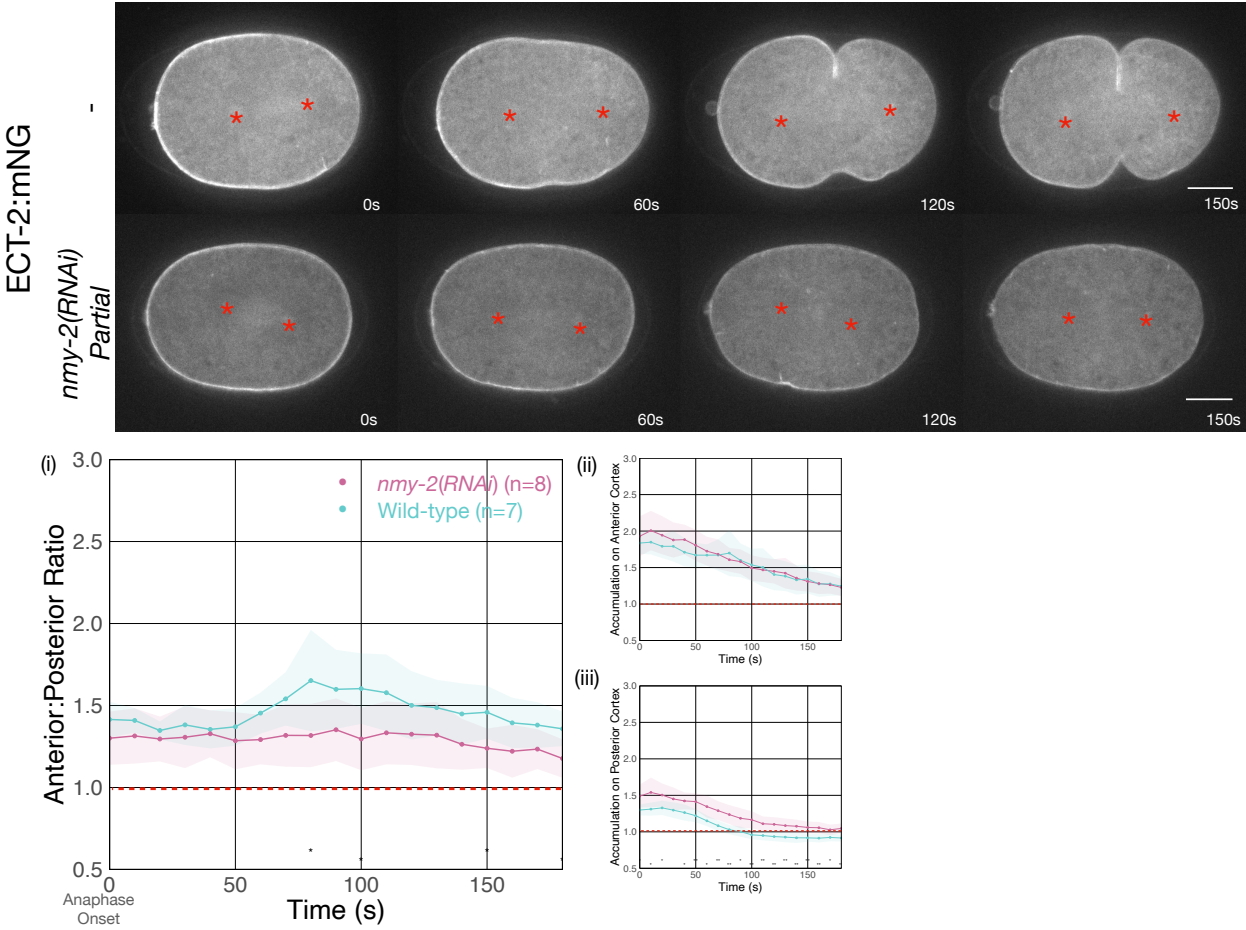

Supplement: supp [file elife_poa_e83992_Figure_3_figure_supplement_1.pdf › elife_poa_e83992_Figure_3_figure_supplement_1.pdf]

Cytokinesis

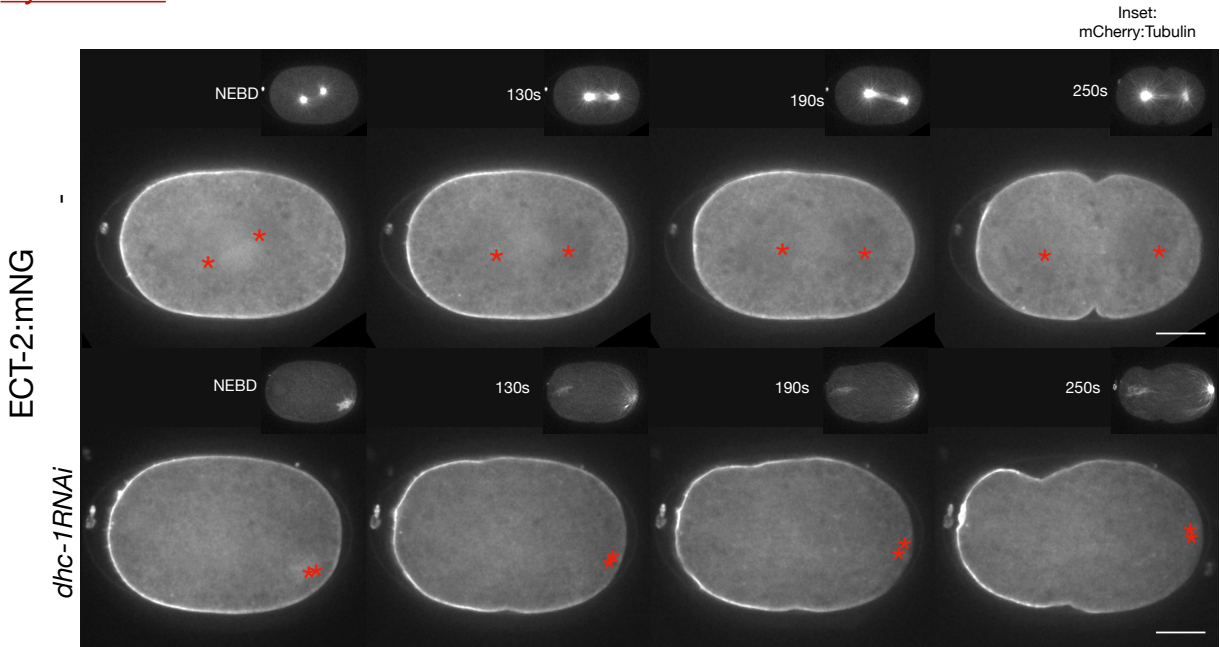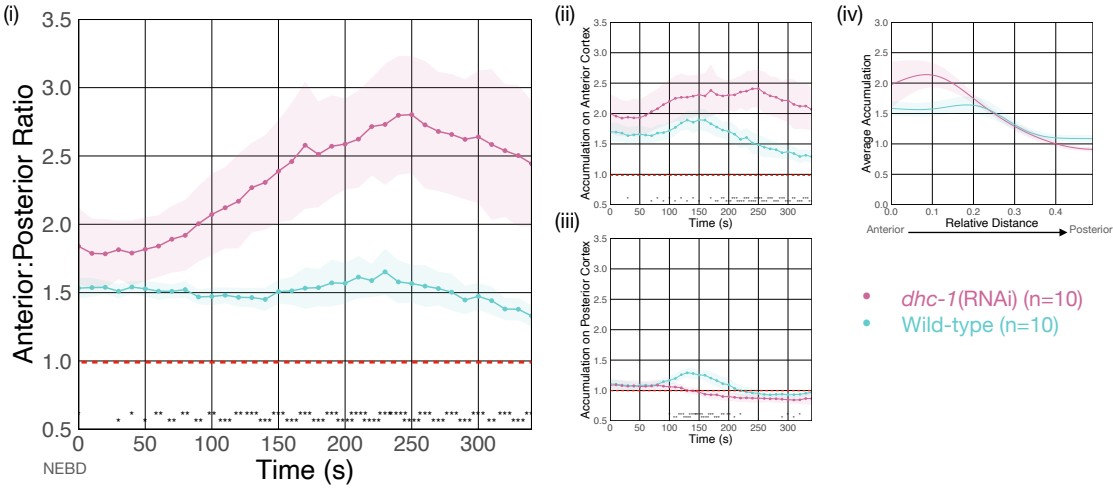

Supplement: supp [file elife_poa_e83992_Figure_3_figure_supplement_2.pdf › elife_poa_e83992_Figure_3_figure_supplement_2.pdf]

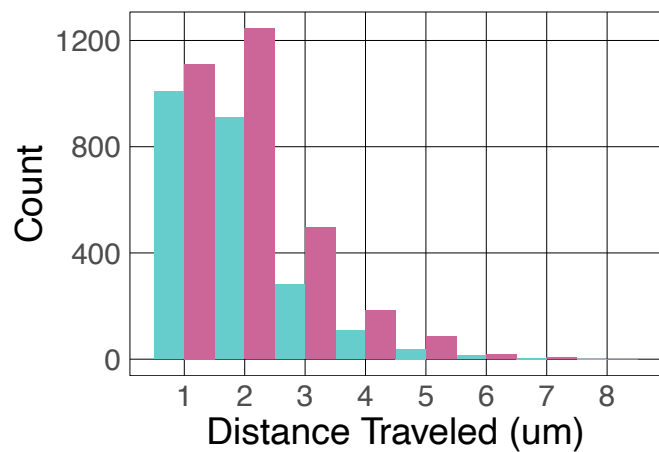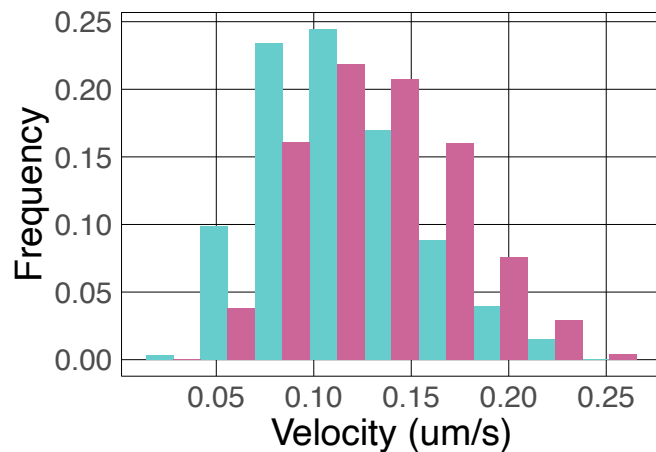

- *zyg-9(RNAi)* (3146 particles tracked from 5 embryos)
- Wild-type (2365 particles tracked from 5 embryos)

Supplement: supp [file elife_poa_e83992_Figure_3_figure_supplement_3.pdf › elife_poa_e83992_Figure_3_figure_supplement_3.pdf]

ECT-2:mNG  
(Post FRAP image)

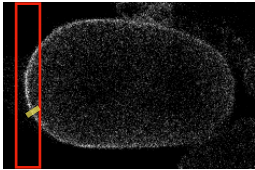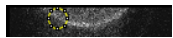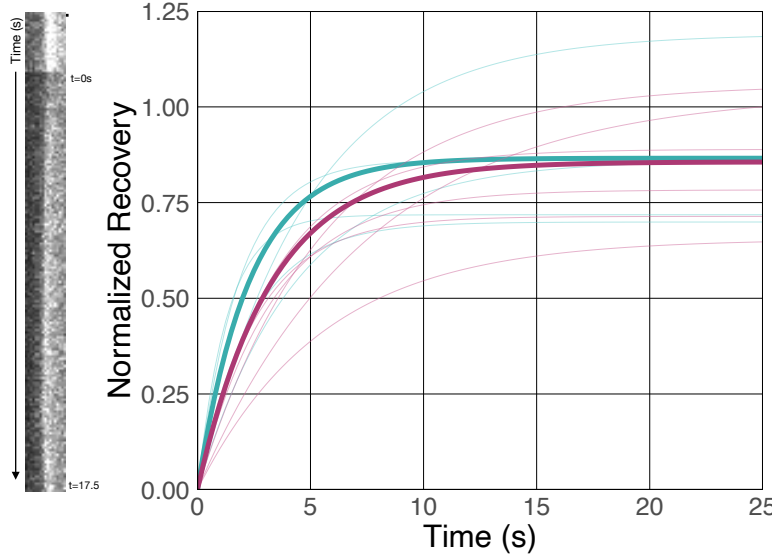

- Cytokinesis (n=6)

- Polarization (n=5)

Supplement: supp [file elife_poa_e83992_Figure_3_figure_supplement_4.pdf › elife_poa_e83992_Figure_3_figure_supplement_4.pdf]

Cytokinesis

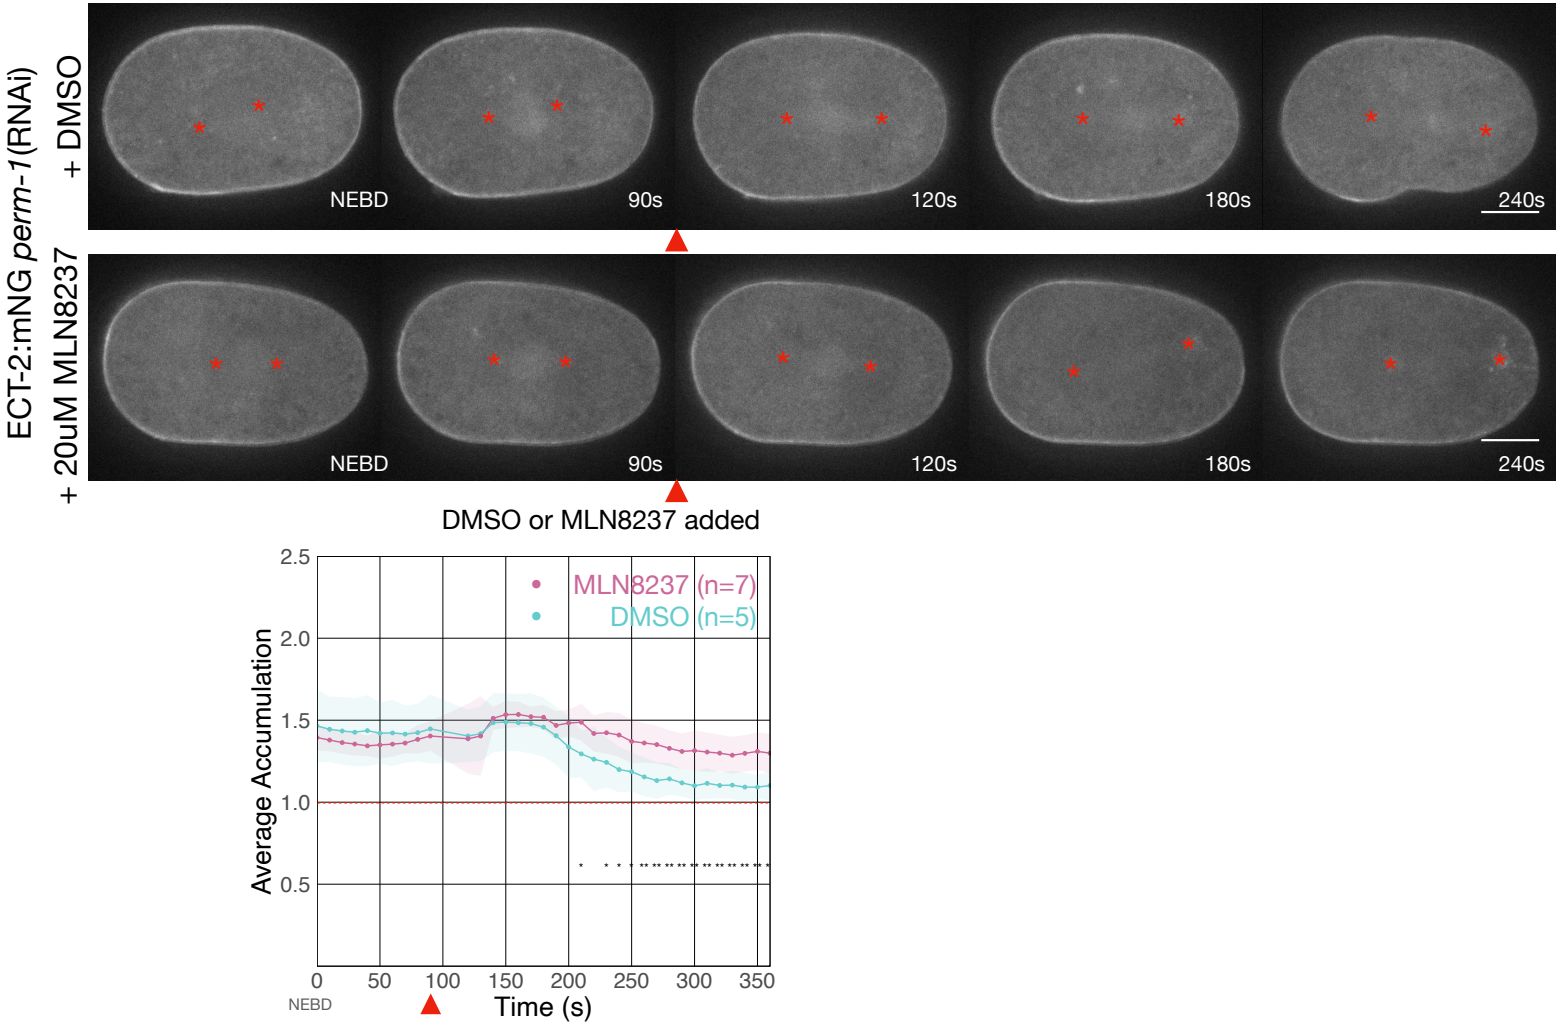

Supplement: supp [file elife_poa_e83992_Figure_4_figure_supplement_1.pdf › elife_poa_e83992_Figure_4_figure_supplement_1.pdf]

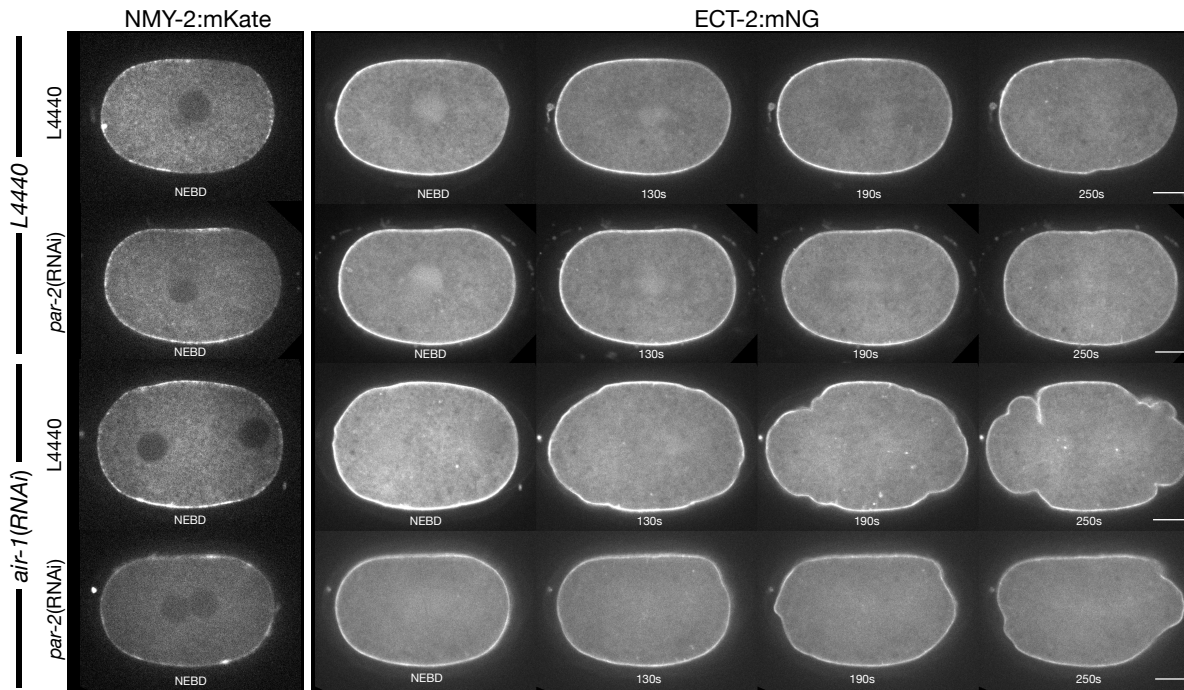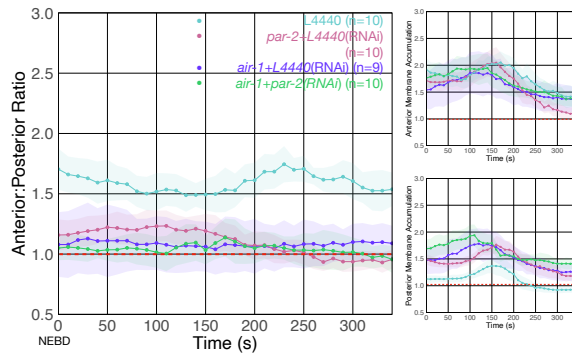

Supplement: supp [file elife_poa_e83992_Figure_4_figure_supplement_2.pdf › elife_poa_e83992_Figure_4_figure_supplement_2.pdf]

GFP:ECT-2<sup>C</sup>

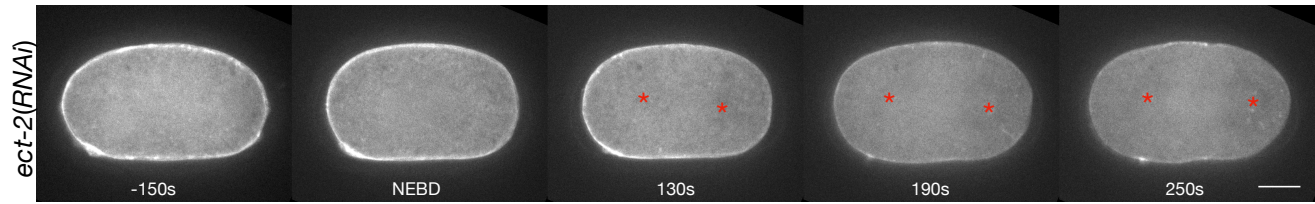

Supplement: supp [file elife_poa_e83992_Figure_5_figure_supplement_1.pdf › elife_poa_e83992_Figure_5_figure_supplement_1.pdf]

Cytokinesis

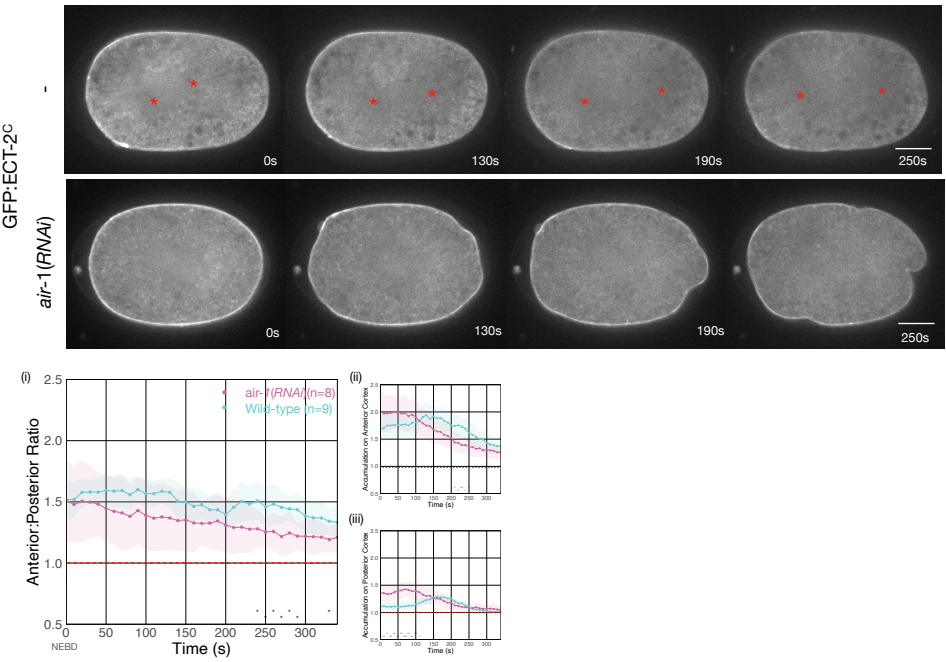

Supplement: supp [file elife_poa_e83992_Figure_5_figure_supplement_2.pdf › elife_poa_e83992_Figure_5_figure_supplement_2.pdf]
